# Supplementary material
Source: PubMed Central journal article supplement (PMC2662356)
Supplement: NIHMS94501-supplement-Correction.pdf [file NIHMS94501-supplement-Correction.pdf]

**An Organic White Light-Emitting Fluorophore** [*J. Am. Chem. Soc.* **2006**, *128*, 14081–14092]. Youjun Yang, Mark Lowry,\* Corin M. Schowalter, Sayo O. Fakayode, Jorge O. Escobedo, Xiangyang Xu, Huating Zhang, Timothy J. Jensen, Frank R. Fronczek, Isiah M. Warner,\* and Robert M. Strongin\*

Supporting Information. The assignment of seminaphthofluorone-1 (**SNAFR-1**) as a mixture of tautomers (Supporting Information, Figure S31) is incorrect. The correct assignment is a mixture of isomers, **SNAFR-1** and **SNAFR-2**. Importantly, the correction does not affect the novel concept describing red-green-blue and near white emission from seminaphthofluorones (**SNAFR-2**) upon excitation in the UV region. In addition, **SNAFR-1** emits in the blue, orange, and near-infrared (see additional supporting information).

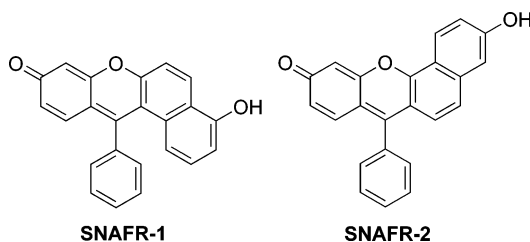

**Supporting Information Available:** New synthetic procedures for **SNAFR-1** and **SNAFR-2** and extensive characterization and spectroscopic data (PDF, CIF). This information is available free of charge via the internet at <http://pubs.acs.org>.

JA068506Q

10.1021/ja068506q

Published on Web 01/03/2007

**Self-Assembly of Coordination Polymers: Evidence for Dynamic Exchange between Oligomers in Solution and the Isolation of a Homochiral Decagold(I) Oligomer** [*J. Am. Chem. Soc.* **2006**, *128*, 15370–15371]. Craig A. Wheaton, Michael C. Jennings, and Richard J. Puddephatt\*

Page 15370. Dr. Dana Eisler was inadvertently omitted from the author list. The author list should read as follows:

Craig A. Wheaton, Dana J. Eisler, Michael C. Jennings, and Richard J. Puddephatt\*

JA069985W

10.1021/ja069985w

Published on Web 01/05/2007
